# Supplementary material for: DNA repair-related genes are the key for stony coral ancestors to survive under elevated levels of UVR
Source: Frontiers journal article supplement (doi:10.3389/fmars.2023.1170565), 2023-05-02
Supplement: Table_1.XLSX [file Table_1.XLSX]

## Sheet: Genomes statistics
Class	Order	Family	Genus	Organism Name	Assembly Accession	Assembly Stats Total Sequence Length	Assembly Level	Assembly Stats Contig N50	Assembly Stats Scaffold N50	Assembly BioProject Lineage Accession	Assembly BioSample Accession	Annotation Count Gene Total	Annotation Count Gene Protein-coding
Actinozoa	Scleractinia	Acroporidae	Acropora	Acropora digitifera	GCF_000222465.1	447478678	Scaffold	10912	483559	PRJDA67425	SAMD00004206	32106	26073
Actinozoa	Scleractinia	Acroporidae	Acropora	Acropora millepora	GCF_013753865.1	475381253	Chromosome	1091365	19840543	PRJNA633778	SAMN14973899	42775	30136
Actinozoa	Scleractinia	Merulinidae	Orbicella	Orbicella faveolata	GCF_002042975.1	485532801	Scaffold	12466	1162446	PRJNA378841	SAMN06562666	30175	25929
Actinozoa	Scleractinia	Pocilloporidae	Pocillopora	Pocillopora damicornis	GCF_003704095.1	234333463	Scaffold	25941	326133	PRJNA454489	SAMN09007954	23077	19935
Actinozoa	Scleractinia	Pocilloporidae	Stylophora	Stylophora pistillata	GCF_002571385.1	400103141	Scaffold	20610	457453	PRJNA281535	SAMN03491624	28908	24846
Actinozoa	Actiniaria	Actiniidae	Actinia	Actinia tenebrosa	GCF_009602425.1	238179736	Scaffold	13051	188789	PRJNA505921	SAMN10439458	22927	19980
Actinozoa	Actiniaria	Aiptasiidae	Exaiptasia	Exaiptasia diaphana	GCF_001417965.1	256132296	Scaffold	14401	442145	PRJNA261862	SAMN03839803	24862	22509
Actinozoa	Actiniaria	Edwardsiidae	Nematostella	Nematostella vectensis	GCF_932526225.1	269418438	Chromosome	2927189	17865913	PRJEB51373	SAMEA8534429	38762	19231
Actinozoa	Alcyonacea	Xeniidae	Xenia	Xenia sp. Carnegie-2017	GCF_021976095.1	222699550	Scaffold	1122448	14832246	PRJNA548325	SAMN23741995	26389	18425
Actinozoa	Alcyonacea	Nephtheidae	Dendronephthya	Dendronephthya gigantea	GCF_004324835.1	286131786	Contig	1445523		PRJNA507923	SAMN10516674	29721	22045
Actinozoa	Pennatulacea	Renillidae	Renilla	Renilla reniformis	GCA_900177555.1	131554742	Scaffold	1741	1843	PRJEB20462	SAMEA103980763		23671
Hydrozoa	Anthoathecata	Hydridae	Hydra	Hydra vulgaris	GCF_022113875.1	819386744	Chromosome	756747	55045248	PRJNA703404	SAMN18321928	28611	21385
